# Supplementary material for: High-Fat Diet–Induced Adipocyte Cell Death Occurs Through a Cyclophilin D Intrinsic Signaling Pathway Independent of Adipose Tissue Inflammation
Source: PubMed Central journal article supplement — Diabetes. 2011 Jul 18;60(8):2134–43. doi: 10.2337/db10-1411 (PMC3142076; doi:10.2337/db10-1411), 2011-07-18

SUPPLEMENTARY DATA

**Supplementary Figure 1. GM-CSF null mice are protected against prolonged HFD-induced adipose tissue macrophage infiltration.** A) Wild type and GM-CSF null male mice at 9 weeks of age were placed on NCD or HFD for 14 weeks. The entire epididymal adipose tissue fat pad from three mice per condition were isolated, pooled, the stromal vascular fraction isolated and subjected to flow cytometry analysis following labeling with F4/80 and CD11c antibodies as described under Material and Methods. **B)** Average body weight of 8 WT and GM-CSF null mice on HFD for 0, 4, 8 and 14 weeks. N.S., non-specific.

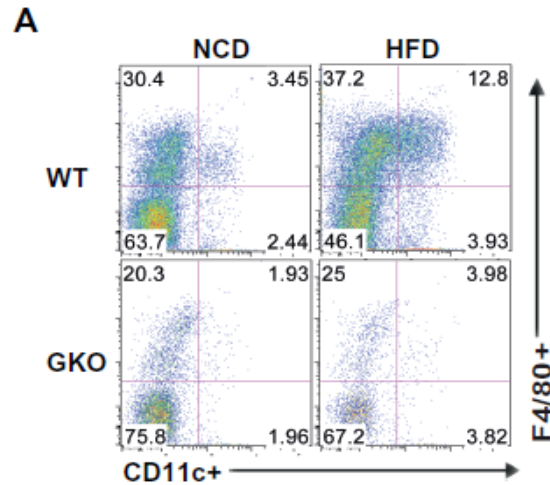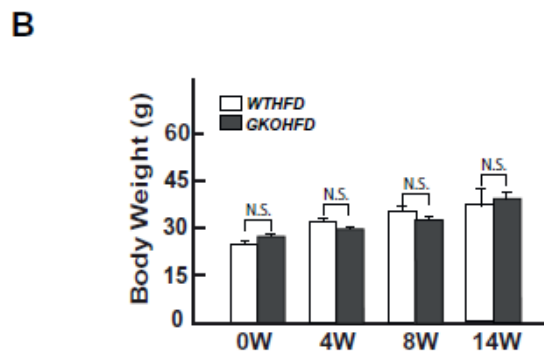

SUPPLEMENTARY DATA

**Supplementary Figure 2. GM-CSF null mice are protected against HFD-induced pro-inflammatory cytokine/chemokine expression in adipose tissue.** Wild type and GM-CSF null male mice at 8 weeks of age were placed on NCD or HFD for 4 (A) or 8 (B) weeks. RNA was extracted from an entire epididymal adipose tissue fat pad and was subjected to quantitative PCR. The relative levels of F4/80, CD11c, Adam8, MCP-1 and CCR5 were normalized to the expression of the 38B4 transcript. The relative levels of TNF- $\alpha$ , IL-6 and IFN- $\gamma$  were normalized to the RPL7 transcript. Data shown are the mean  $\pm$  standard error of the mean for 3-5 mice per group and statistical analysis was performed using a one-way ANOVA followed by post hoc analysis for comparison between individual groups. Identical letters indicate values that are not statistically different from each other ( $p > 0.05$ ).

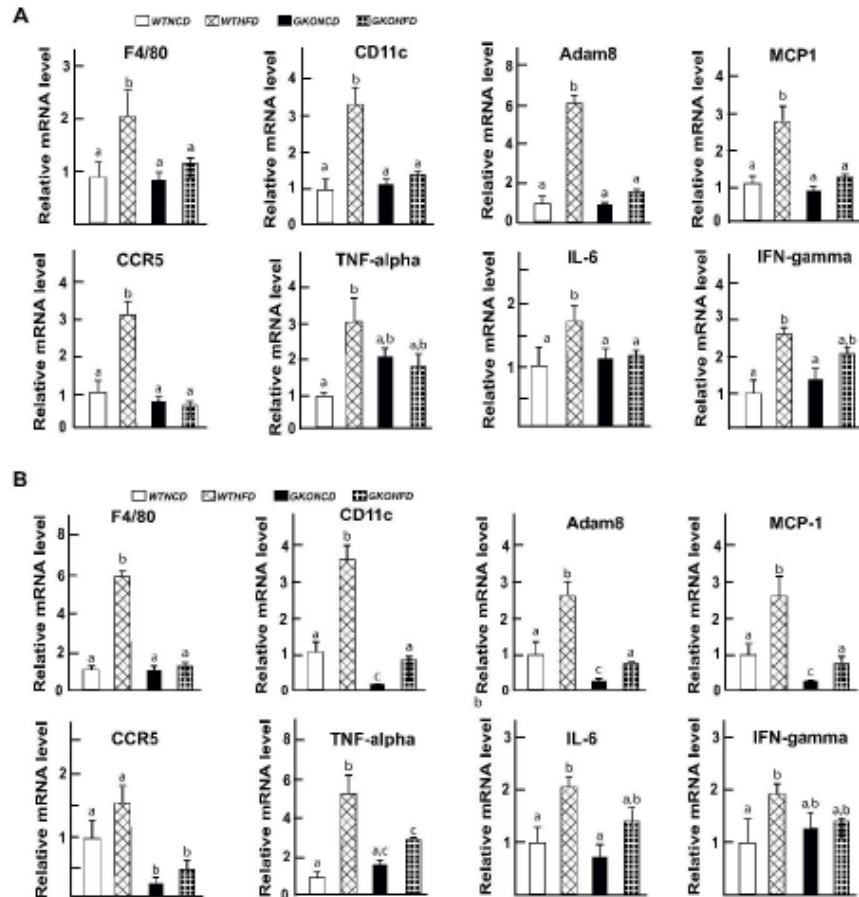

SUPPLEMENTARY DATA

**Supplementary Figure 3. Knockdown of CyP-D has no effect on 3T3L1 adipocyte differentiation.** 3T3L1 cells were infected with a control lentivirus (A) and with a lentivirus encoding shRNA directed against CyP-D (B). Following selection of multiple cell lines, the cells underwent adipogenesis using the standard adipocyte differentiation cocktail for 10 days as described under Materials and Methods. The cells were then stained with Oil red O to detect the presence of neutral lipids. These are images from one representative cell line each and identical results were obtained for 3 independent cell lines.

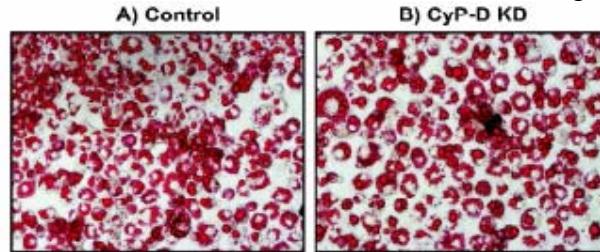

**Supplementary Figure 4. CyP-D null and wild type mice display a comparable extent of HFD-induced pro-inflammatory cytokine/chemokine expression in adipose tissue.** Wild type and CyP-D null male mice at 9 weeks of age were placed on NCD or HFD for 12 weeks. RNA was extracted from an entire epididymal adipose tissue fat pad and was subjected to quantitative PCR. The relative levels of F4/80, CD11c, MCP-1, TNF- $\alpha$ , IL-6 and IFN- $\gamma$  were normalized to the expression of the  $\beta$ -actin transcript. The relative levels of Adam8 and CCR5 were normalized to the cyclophilin B transcript. Data shown are the mean  $\pm$  standard error of the mean for 4-6 mice per group and statistical analysis was performed using a one-way ANOVA followed by post hoc analysis for comparison between individual groups. Identical letters indicate values that are not statistically different from each other ( $p > 0.05$ ).

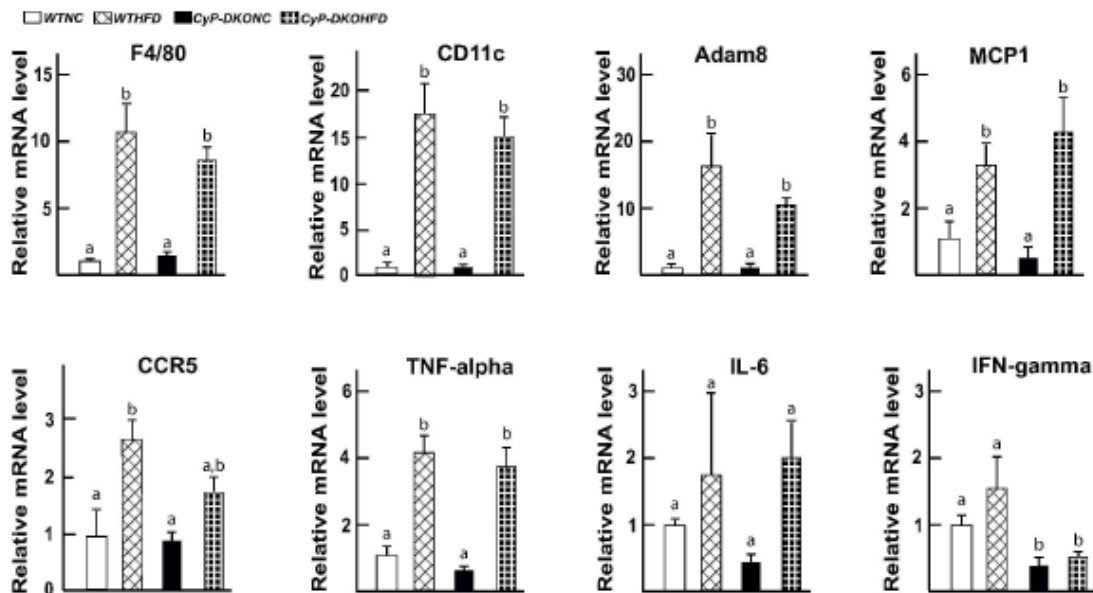

Supplement: supp_db10-1411_DB101411SupplementaryData.pdf [file supp_db10-1411_DB101411SupplementaryData.pdf]
